1 **Effects of imidacloprid and thiamethoxam at LC<sub>30</sub> and LC<sub>50</sub> on the life table of soybean aphid**

2 *Aphis glycines* (Hemiptera: Aphididae)

3 **Running title:** Effects of imidacloprid and thiamethoxam on *Aphis glycines*

4

5 Aonan Zhang<sup>1</sup>, Lin Zhu<sup>1</sup>, Zhenghao Shi<sup>1</sup>, Kuijun Zhao<sup>1</sup>, Tianying Liu<sup>1</sup>, Lanlan Han<sup>1\*</sup>

6

7 <sup>1</sup> College of Agriculture, Northeast Agricultural University, 59 Wood Street, Harbin, Heilongjiang

8 150030, PR China.

9

10 \*Corresponding author

11 E-mail: hanll\_neau@aliyun.com (HL)

12

13 **Financial support:** This work was supported by the Heilongjiang Science Foundation Project (grant

14 number C2018011), Special Fund for Construction of Modern Agricultural Industry Technology

15 System (grant number CARS-04), and Research and Development of Technology and Products on

16 Nature Enemy Insects Prevent and Control (No: 2017YFD0201000).

## Abstract

17 The soybean aphid, *Aphis glycines* Matsumura (Hemiptera: Aphididae), is a main pests of soybean that  
18 poses a serious threat to its production. Studies were conducted to understand effects of the different  
19 concentrations of the insecticides (imidacloprid and thiamethoxam) on the life table of *A. glycines* to  
20 provide vital information for its effective management. We found that the mean generation time, adult  
21 and total pre-oviposition periods in *A. glycines* specimens exposed to LC<sub>50</sub> imidacloprid and  
22 thiamethoxam were significantly longer than those in the control group. However, when exposed to LC<sub>30</sub>  
23 imidacloprid and thiamethoxam, the adult pre-ovipositional period was significantly shorter than that in  
24 the control group. The mean fecundity per female adult, net reproductive rate, intrinsic rate of increase,  
25 and finite rate of increase were significantly decreased in individuals exposed to LC<sub>30</sub> and LC<sub>50</sub>  
26 concentrations of imidacloprid and thiamethoxam, respectively ( $P < 0.05$ ). Both insecticides produce  
27 stress effects on *A. glycines*, and specimens treated with LC<sub>50</sub> concentrations of the two insecticides  
28 exhibited a significant decrease in their growth rates than those treated with LC<sub>30</sub> concentrations. This  
29 study provides data that can be used as a reference to predict the effect of imidacloprid and thiamethoxam  
30 on the population dynamics in the field, and agricultural producers could attach importance to prevent  
31 stimulation the reproduction made by low-lethal concentrations during actually applying pesticides.

32 **Keywords:** imidacloprid, thiamethoxam, soybean aphid, life table, reproduction, population

## Introduction

33 The soybean aphid, *Aphis glycines* Matsumura (Hemiptera: Aphididae), was first detected in North  
34 America in 2000 and had rapidly spread to north-central and northeastern United States and southeastern  
35 Canada. Although the damage from *A. glycines* to soybeans is rarely devastating in Asia, it is considered  
36 a primary pest in North America (Ragsdale, Voegtlin, & O'neil, 2004; Wang, Kritzman, Hershman, &  
37 Ghabrial, 2006; Ragsdale, Landis, Brodeur, Brodeur, & Desneux, 2011; Hopper et al., 2017).

38 Foliar insecticides have been commonly used to effectively control *A. glycines* (Lee, 2000). By the late  
39 1990s, neonicotinoid insecticides had been introduced worldwide due to their high efficiency, low  
40 toxicity, and wide application range (Srigiriraju, Semtner, & Bloomquist, 2010; Basit, Saeed, Saleem,  
41 Denholm, & Shah, 2013). The sales of neonicotinoids accounted for more than 25 % of the global  
42 insecticide sales in 2014 (Bass, Denholm, Williamson, & Nauen, 2015). Imidacloprid is a  
43 first-generation neonicotinoid (Matsuda, Buckingham, Kleier, Rauh, Grauso, & Sattelle, 2001), and  
44 thiamethoxam is a second-generation neonicotinoid and has higher activity, better safety, and longer  
45 duration of efficacy (Shi, Wang, Liu, Qi, & Yu, 2017).

46 The insecticidal effect of a particular insecticide is closely related to its type, application method, and  
47 application frequency (Xie et al., 2010). The drift and degradation of neonicotinoids themselves in the  
48 fields would make the doses of some aphids exposed to lower than those normally recommended for  
49 control. The lower doses permit survival of heterozygotes for resistance thereby fixing a resistant gene  
50 in a population more rapidly (Nauen & Denholm, 2005). The risk of the rapid development of resistant  
51 populations, secondary pest outbreaks, and rapid deterioration of the ecological environment was greatly

52 increased (Isman, 2006; Khan, Abbas, Shad, & Afzal, 2014; Hanson et al., 2017; Zhao et al., 2018;  
53 Somar, Zamani, & Alizadeh, 2019).

54 A monitoring study performed in 2008 and 2011 reported an increased adaptation of the cotton aphid  
55 *Aphis gossypii* Glover to neonicotinoids in the south-central United States (Gore et al., 2013). In  
56 addition, cotton aphids from six different locations in Korea also exhibited adaptation to common  
57 neonicotinoids (Koo, An, Park, Kim, & Kim, 2014). Imidacloprid was the first commercial  
58 neonicotinoid used to control rice planthoppers in the early 1990s; however, after 10 years of its  
59 large-scale use in Asia, the sensitivity of rice planthoppers to imidacloprid decreased (Matsumura et al.,  
60 2013; Tao et al., 2019). *Bemisia tabaci* biotype Q (Hemiptera: Aleyrodidae) showed a similar response to  
61 conventional neonicotinoids (Luo, Jones, Devine, Zhang, Denholm, Denholm, & Gorman, 2010; Nauen  
62 et al., 2014).

63 To solve the recent problem of the rapid increase in pest adaptation to neonicotinoids, it is of great  
64 significance to carry out population dynamic analysis and to formulate an accurate application scheme  
65 (Felicangeli & Rabinovich, 1985; Stark & Wennergren, 1995; Gabre, Adham, & Chi, 2005; Bass et al.,  
66 2011; Abbas, Shad, & Shah, 2015; Jan, Abbas, Shad, & Saleem, 2015). In this study, based on the life  
67 table of *A. glycines*, we evaluated the effects of imidacloprid and thiamethoxam on the reproductive  
68 development and population dynamics of *A. glycines* to provide a reference for the accurate use of these  
69 insecticides for controlling *A. glycines* populations.

## Materials and methods

### Laboratory aphid population and chemical agents

70 The laboratory strain of *A. glycines* used in this study was originally collected from a soybean field in  
71 Harbin, Heilongjiang Province, China. This strain had been cultured in the laboratory for several years  
72 and never been exposed to any insecticides. Dongnong 52 soybean plants were used to maintain the  
73 strain of *A. glycines* at Northeast Agricultural University, China. Soybean plants were grown in pots (15  
74 cm diameter × 17 cm depth), with six plants in each pot kept at  $25 \pm 1$  °C, a relative humidity of  
75 65–70%, and a photoperiod of 14:10 (L:D) h. The laboratory aphid colony was maintained in the same  
76 environmental conditions as the chamber used for plant germination. Twelve pots with soybean plants  
77 were placed in a large tray (70 × 60 cm; L × W). Twice a week, one third of the old aphid-infested  
78 soybean plants (i.e., the four oldest pots with an aphid infestation) were removed and replaced with new  
79 aphid-free ones. Aphids were transferred by placing infested leaves on uninfested plants. This prevented  
80 the accumulation of excessive honeydew and sooty mold and ensured the provision of a homogeneous  
81 soybean plant for the aphids to feed on (Menger et al., 2020).

82 Water dispersible granules of insecticides (70% imidacloprid and 50% thiamethoxam) were purchased  
83 from North China Pharmaceutical Group Corporation, Hebei, China and Shaanxi Thompson  
84 Biotechnology Co., Ltd., Shaanxi, China respectively. Calcium nitrate, potassium nitrate, potassium  
85 dihydrogen phosphate, magnesium sulfate, disodium ethylenediaminetetraacetic acid (disodium EDTA),  
86 and streptomycin sulfate were all purchased from Shanghai Alighting Biochemical Technology Co.,  
87 Ltd., Shanghai, China.

#### **Preparation of culture medium**

88 Non-toxic, transparent plastic Petri dishes (6 cm diameter × 1.5 cm height) were used to perform the  
89 bioassay on newly hatched nymphs of *A. glycines* and the life table study. The components of the plant  
90 nutrient solution concentrate used to prepare the medium were as follows: calcium nitrate (4.1 g),  
91 potassium nitrate (2.5 g), potassium dihydrogen phosphate (0.7 g), magnesium sulfate (0.6 g), 1.54%  
92 disodium EDTA aqueous solution (5.0 mL), one million units of streptomycin sulfate (0.05 g), and  
93 distilled water (5.0 L). The diluent was obtained by mixing the plant nutrient solution concentrate with  
94 distilled water at a ratio of 1:3. Agar was prepared by mixing 1% w/w agar powder with diluent and was  
95 boiled while constantly mixing. After cooling for approximately 10 minutes, the warm agar was poured  
96 into the Petri dishes to a depth of at least 3–4 mm. At least 10 mm distance was allowed between the top  
97 of the agar and the rim of the Petri dishes. The metal tube was used to cut leaf discs from clean, untreated  
98 leaves. The leaf discs were 2 mm lesser in diameter than the Petri dishes and were attached to the agar  
99 medium with the top-side facing down. A metal tube was sharpened and cleaned regularly to ensure the  
100 clean cutting of the leaf discs. *A. glycines* on leaf discs fed on the bottom surface. Each Petri dish was  
101 then placed upside down to keep *A. glycines* in a natural feeding state. The incision was kept neat to  
102 avoid excessive crushing of the tissue at the edge of the leaves when they were cut. This prevented the  
103 leaves from rapidly developing mildew.

#### **Dose response bioassay**

104 The dose response bioassays were conducted with newly hatched *A. glycines* nymphs using a leaf dip  
105 method recommended by the Insecticide Resistance Action Committee (IRAC);

106 <http://www.irac-online.org/resources/methods.asp>). Insecticidal stock solutions were prepared in 1%  
107 acetone and further diluted to different concentrations using distilled water containing 0.05 % (v/v)  
108 Triton X-100 before using in dose response bioassay. According to the preliminary bioassays, seven  
109 concentrations of imidacloprid (19.95 mg a.i./L, 13.70 mg a.i./L, 9.10 mg a.i./L, 6.10 mg a.i./L, 3.47 mg  
110 a.i./L, 2.35 mg a.i./L, 1.88 mg a.i./L) and thiamethoxam (29.95 mg a.i./L, 24.98 mg a.i./L, 14.97 mg  
111 a.i./L, 10.05 mg a.i./L, 4.94 mg a.i./L, 3.64 mg a.i./L, 1.98 mg a.i./L) were prepared respectively. Fresh  
112 soybean leaf discs were immersed in solutions of seven concentrations; each leaf disc was immersed in a  
113 specific concentration for 10 s, removed from the solution, and placed on paper towels (abaxial surface  
114 facing up) to air dry. The control leaf disc was immersed in a solution of distilled water containing 0.05  
115 % (v/v) Triton X-100 and 1 % acetone. The air-dried leaf discs were attached to the agar medium with the  
116 top-side facing down and newly hatched nymphs were placed on them. Treatment details (insecticide,  
117 concentration, and date) were recorded for each Petri dish. A small drop of distilled water was placed on  
118 the surface of the agar prior to laying the leaf on the surface to help the leaf stick to the agar surface. Sixty  
119 newly hatched nymphs were used for dose response bioassays at each concentration; three replicates  
120 were used per concentration and each replicate had 20 newly hatched nymphs. Mortality was determined  
121 after 24 h of exposure. The newly hatched nymphs were considered dead if they were found upside down  
122 and not moving or if they did not move when prodded with a small paint brush (Cordero, Bloomquist, &  
123 Kuhar, 2007). The toxicity of imidacloprid and thiamethoxam to the nymphs were statistically analyzed  
124 using SPSS (version 23.0, SPSS Inc., Chicago, IL, USA) and the LC<sub>50</sub> and LC<sub>30</sub> values for the newly  
125 hatched nymphs were obtained.

### Life table study

126 One hundred and fifty apterous adults were transferred onto fifteen leaf discs using a small paint brush  
127 and 10 apterous adults were placed on each leaf disc. Each Petri dish containing a leaf disc was sealed  
128 with a close-fitting, ventilated lid. Newly hatched nymphs were selected 24 h later and placed on a leaf  
129 disc pre-impregnated with LC<sub>30</sub> and LC<sub>50</sub> imidacloprid and thiamethoxam or a leaf disc pre-impregnated  
130 with distilled water containing 0.05 % (v/v) Triton X-100 and 1 % acetone.  
131 One hundred newly hatched nymphs were exposed to each treatment; each newly hatched nymph was  
132 kept in a separate Petri dish, and each Petri dish was treated as one replicate. The growth, survival,  
133 mortality, and fecundity of the individuals were observed until all organisms died. After reaching the  
134 adult stage, the number of newly hatched nymphs reproduced by each adult every day was recorded and  
135 removed after recording.

### Life table analysis

136 The age-stage-specific survival rate ( $s_{xj}$ ,  $x$  = age,  $j$  = stage), age-specific survival rate ( $l_x$ ), age-stage  
137 specific fecundity ( $f_{xj}$ ), and age-specific fecundity ( $m_x$ ) were calculated as follows (Chi & Liu, 1985; Chi  
138 & Getz, 1988; Chi, 1988).

139 
$$s_{xj} = \frac{n_{xj}}{n_{01}}, \quad (1)$$

140 
$$l_x = \sum_{j=1}^k s_{xj}, \quad (2)$$

141 
$$m_x = \frac{\sum_{j=1}^k s_{xj} f_{xj}}{\sum_{j=1}^k s_{xj}}, \quad (3)$$



142 where  $n_{01}$  stands for the number of newly hatched nymphs and  $k$  stands for the number of stages. The net  
143 reproductive rate ( $R_0$ ), intrinsic rate of increase ( $r$ ), finite rate of increase ( $\lambda$ ), and mean generation time  
144 ( $T$ ) were calculated as follows (Goodman, 1982):

$$145 \quad R_0 = \sum_{x=0}^{\infty} l_x m_x, \quad (4)$$

$$146 \quad \sum_{x=0}^{\infty} e^{-r(x+1)} l_x m_x = 1, \quad (5)$$

$$147 \quad \lambda = e^r, \quad (6)$$

$$148 \quad T = \frac{\ln R_0}{r}. \quad (7)$$

149 The life expectancy ( $e_{xj}$ ), i.e. the time that an individual of age  $x$  and stage  $j$  is expected to live, was  
150 calculated according to Chi & Su (2006) as

$$151 \quad e_{xj} = \sum_{i=x}^{\infty} \sum_{y=j}^k s'_{iy}, \quad (8)$$

152 where  $s'_{iy}$  is the probability that an individual of age  $x$  and stage  $j$  would survive to age  $i$  and stage  $y$ .

153 Fisher (1993) defined the reproductive value ( $v_{xj}$ ) as the contribution of individuals of age  $x$  and stage  $j$   
154 to the future population. It was calculated as

$$155 \quad v_{xj} = \frac{e^{r(x+1)}}{s_{xj}} \sum_{i=x}^{\infty} e^{-r(i+1)} \sum_{y=j}^k s'_{iy} f_{iy}. \quad (9)$$

156 TWSEX-MSChart software was used to estimate the mean values and standard errors of the population  
157 parameters, mean longevity of first instar to fourth instar nymphs and adults, adult and total  
158 pre-ovipositional period, mean fecundity per female adult, and the bootstrap test method was used to  
159 compare the differences in all the treatments ( $B = 100,000$ ; Chi, 2012). All curve graphs were generated  
160 using SigmaPlot 12.0.

## Results

### Dose response bioassay for newly hatched nymphs of *A. glycines*

161 The LC<sub>50</sub> concentrations for imidacloprid and thiamethoxam were 4.440 (3.672–5.335) mg a.i./L and  
162 7.049 (5.394–8.998) mg a.i./L respectively, whereas their LC<sub>30</sub> concentrations were 3.114 (2.425–3.757)  
163 mg a.i./L and 4.184 (2.850–5.460) mg a.i./L, respectively (Table 1).

### Life history traits

164 Imidacloprid and thiamethoxam had effects on the development time, longevity, and fecundity of *A.*  
165 *glycines* (Table 2). Compared with that in the control group, exposure to LC<sub>50</sub> imidacloprid and  
166 thiamethoxam resulted in longer first instar development time, adult pre-ovipositional period (APOP),  
167 and total pre-ovipositional period (TPOP;  $P < 0.05$ ), but decreased fecundity ( $P < 0.05$ ) and adult  
168 longevity ( $P < 0.05$ ).

169 Compared with that in the control group (1.20 d), the development time of second instar nymphs  
170 increased significantly when exposed to LC<sub>50</sub> imidacloprid (1.43 d,  $P < 0.05$ ), but no significant change  
171 was observed in nymphs exposed to LC<sub>50</sub> thiamethoxam (1.28 d,  $P > 0.05$ ). The development time of the  
172 third and fourth instars did not change on exposure to LC<sub>50</sub> imidacloprid and thiamethoxam ( $P > 0.05$ ).

173 Exposure to LC<sub>30</sub> imidacloprid and thiamethoxam had no significant effect on the development time of  
174 the first to fourth instars ( $P > 0.05$ ). However, LC<sub>30</sub> imidacloprid and thiamethoxam decreased the APOP  
175 and reduced the fecundity of *A. glycines* compared with that in the control ( $P < 0.05$ ). The longevity of  
176 adults exposed to LC<sub>30</sub> imidacloprid and thiamethoxam was significantly decreased compared with that

177 of the control group (11.02, 8.95, and 9.31 d in control, imidacloprid, thiamethoxam groups,  
178 respectively;  $P < 0.05$ ). The TPOP of *A. glycines* exposed to LC<sub>30</sub> imidacloprid (4.55 d) showed no  
179 significant difference ( $P > 0.05$ ) compared to that in the control group (4.66 d), whereas that of *A.*  
180 *glycines* exposed to LC<sub>30</sub> thiamethoxam was significantly decreased (4.29 d;  $P < 0.05$ ).

### Life table and fertility parameters

181 The mean fecundity per female adult,  $R_0$ ,  $r$ , and  $\lambda$  decreased significantly in the imidacloprid and  
182 thiamethoxam treatment groups compared to the control group ( $P < 0.05$ , Table 3). The  $T$  in LC<sub>50</sub>  
183 imidacloprid (9.50 d) and thiamethoxam (9.16 d) treatment groups was significantly longer compared  
184 with that in the control group (8.20 d;  $P < 0.05$ ). In contrast, the  $T$  in the LC<sub>30</sub> thiamethoxam (7.71 d)  
185 group was significantly decreased compared with that in the control group ( $P < 0.05$ ), whereas that in the  
186 LC<sub>30</sub> imidacloprid (7.99 d) group showed no significant change ( $P > 0.05$ , Table 3).

187 Due to the different development rates between individuals, the age-stage specific survival rates  
188 curves show obvious overlaps (Fig 1). The relative number of female adults in the LC<sub>30</sub> imidacloprid and  
189 thiamethoxam treatment groups was higher than that in the respective LC<sub>50</sub> treatment groups.

190 Age-specific survival rate is the probability that a newly hatched nymph will reach an age  $x$ , and the  
191 curve of the age-specific survival rate is a simplified form of the curve of the age-stage survival rate,  
192 disregarding developmental stages. After treatment with imidacloprid and thiamethoxam, the  $l_x$  curve  
193 decreased significantly (Fig 2).

194 The highest peak of  $m_x$  in the control group was higher than that in LC<sub>30</sub> and LC<sub>50</sub> treatment groups.

195 The highest peak of  $m_x$  in the control group appeared on day 8 (Fig 2), whereas that in the LC<sub>30</sub>

196 imidacloprid group appeared on day 7, i.e., a day earlier than that in the control group. The highest peak  
197 of  $m_x$  in the LC<sub>30</sub> thiamethoxam group appeared on day 6, two days earlier than that in the control group.  
198 The highest peak of  $m_x$  in the LC<sub>50</sub> imidacloprid group appeared on day 10, two days later than that in the  
199 control group, while the highest peak of  $m_x$  in the LC<sub>50</sub> thiamethoxam group appeared on day 9; a day  
200 later than that in the control group (Fig 2).

201 The values of age-specific maternity ( $l_x m_x$ ) were significantly dependent on  $l_x$  and  $m_x$ , and the  
202 maximum  $l_x m_x$  values were 8, 8, 9, 7, and 6 d for the control, LC<sub>50</sub> imidacloprid, LC<sub>50</sub> thiamethoxam,  
203 LC<sub>30</sub> imidacloprid, and LC<sub>30</sub> thiamethoxam treatment groups, respectively.

204 The female reproductive values in the imidacloprid and thiamethoxam treatment groups decreased  
205 compared with those in the control group; however, the female reproductive value in the LC<sub>30</sub> treatment  
206 group was higher than that in the LC<sub>50</sub> group (Fig 3).

207 The age-stage life expectancy curve ( $e_{xj}$ ) is shown in Fig 4. In the curve, the highest peak values of  
208 the first to fourth instar nymphs and female adults were lower in the treatment groups compared with the  
209 control group.

## Discussion

210 The life table parameters used herein reflect the total effect of imidacloprid and thiamethoxam on *A.*  
211 *glycines*. We found that imidacloprid and thiamethoxam at LC<sub>50</sub> significantly increased the APOP and  
212 TPOP and significantly decreased the mean fecundity per female adult compared with that in the control  
213 group ( $P < 0.05$ ). In contrast, the APOP in individuals exposed to imidacloprid and thiamethoxam at  
214 LC<sub>30</sub> was shorter than that in the control group ( $P < 0.05$ , Table 2). In addition, according to the results in

215 the age-stage two-sex life table, the  $R_0$ ,  $\lambda$ , and  $r$  also decreased significantly ( $P < 0.05$ , Table 3).

216 Collectively, these results indicate that both imidacloprid and thiamethoxam have inhibitory effects on

217 the reproduction of *A. glycines*.

218 The  $l_x$  curve is a basis for the  $s_{xy}$  curve. In this study, we found that the  $l_x$  curves of individuals

219 exposed to imidacloprid and thiamethoxam showed a declining trend (Fig 2). During the first stage, *A.*

220 *glycines* failed to respond effectively when initially exposed to a high dosage of insecticide;

221 consequently, the  $l_x$  decreased sharply, and only some surviving individuals entered the second stage.

222 During the second stage, intoxicated aphids refuse to eat or eat in small amounts and spend energy trying

223 to get out of the toxic arena. This was the stage of confrontation between insecticides stress and *A.*

224 *glycines*. The different effects of imidacloprid and thiamethoxam at  $LC_{50}$  and  $LC_{30}$  on the life table may

225 be also related to the regulation strategies of the species, such as self-metabolism and detoxification. In

226 the future research, we will be committed to metabolic detoxification, from the physiological indicators

227 and even molecular level to continue understand the deep impact of imidacloprid and thiamethoxam on

228 population dynamics. During the third stage, the survival rate continued to decline, less sharply than in

229 the first stage, but more sharply than in the second stage. During the third stage, the individual longevity

230 may also be one reason for the decrease of the  $l_x$ ; this is consistent with the decrease in the age-stage life

231 expectancy curve with increasing age (Fig 4).

232 In the present study, individuals in the  $LC_{50}$  thiamethoxam and  $LC_{50}$  imidacloprid treatment groups

233 reached their reproductive peaks 1 and 2 days later compared with those in the control group,

234 respectively. In contrast, individuals in the  $LC_{30}$  thiamethoxam and  $LC_{30}$  imidacloprid treatment groups

235 reached their reproductive peaks 2 and 1 day earlier than the control group, respectively. Different types

236 and doses of insecticides have different biological and ecological effects on pests. More attention should  
237 be paid to the increase of pest reproduction caused by low doses of insecticides (Stark, Tanigoshi,  
238 Bounfour, & Antonelli, 1997; James & Price, 2002). For example, low-lethal concentration of  
239 spinetoram can decrease the developmental time of *Tetranychus urticae* (Acari: *Tetranychidae*) from egg  
240 to adult (Wang, Zhang, Xie, Wu, & Wang, 2016). The rapid increase in the number of *A. glycines*  
241 individuals during the productive peak and the fast reproduction of species from  
242 generation-to-generation indicate that large outbreaks may occur within a short time. This phenomenon  
243 of low-lethal concentration promoting rapid reproduction has brought great pressure on the prevention  
244 and control of *A. glycines* in the field.

245 The actual application doses of neonicotinoids in soybean fields in northeast China was higher than  
246  $LC_{50}$ , but the complex environmental conditions in the fields and the drift of neonicotinoids themselves  
247 would make the doses of some pests exposed to less than  $LC_{50}$ . The risk of low-lethal doses  
248 neonicotinoids stimulate the rapid reproduction of field populations would highly possible happen. We  
249 will continue to study whether field populations show similar trends after exposure to low-lethal doses  
250 neonicotinoids in the future.

251

252

253

254

## 255 **Supporting information**

256 S1 Fig. Age-stage specific survival rate ( $s_{xj}$ ) of *Aphis glycines*. Age-stage specific survival rate ( $s_{xj}$ ) of

257 *Aphis glycines* exposed to the following treatments: control, imidacloprid LC<sub>30</sub> treatment group,  
258 imidacloprid LC<sub>50</sub> treatment group, thiamethoxam LC<sub>30</sub> treatment group, and thiamethoxam LC<sub>50</sub>  
259 treatment group. L1 =  $s_{xj}$  of first instar nymphs; L2 =  $s_{xj}$  of second instar nymphs; L3 =  $s_{xj}$  of third  
260 instar nymphs; and L4 =  $s_{xj}$  of fourth instar nymphs. (XLS)  
261  
262 S2 Fig. Age-specific survival rate ( $l_x$ ), age-specific fecundity of the total population ( $m_x$ ), and  
263 age-specific maternity ( $l_x m_x$ ) of *Aphis glycines*. Age-specific survival rate ( $l_x$ ), age-specific fecundity of  
264 the total population ( $m_x$ ), and age-specific maternity ( $l_x m_x$ ) of *Aphis glycines* exposed to the following  
265 treatments: control, imidacloprid LC<sub>30</sub> treatment group, imidacloprid LC<sub>50</sub> treatment group,  
266 thiamethoxam LC<sub>30</sub> treatment group, and thiamethoxam LC<sub>50</sub> treatment group. (XLS)  
267  
268 S3 Fig. Age-stage specific reproductive values ( $v_{xj}$ ) of *Aphis glycines*. Age-stage specific reproductive  
269 values ( $v_{xj}$ ) of *Aphis glycines* exposed to the following treatments: control, imidacloprid LC<sub>30</sub> treatment  
270 group, imidacloprid LC<sub>50</sub> treatment group, thiamethoxam LC<sub>30</sub> treatment group, and thiamethoxam  
271 LC<sub>50</sub> treatment group. L1 =  $v_{xj}$  of first instar nymphs; L2 =  $v_{xj}$  of second instar nymphs; L3 =  $v_{xj}$  of third  
272 instar nymphs; and L4 =  $v_{xj}$  of fourth instar nymphs. (XLS)  
273  
274 S4 Fig. Life expectancy ( $e_{xj}$ ) of *Aphis glycines*. Life expectancy ( $e_{xj}$ ) of *Aphis glycines* exposed to the  
275 following treatments: control, imidacloprid LC<sub>30</sub> treatment group, imidacloprid LC<sub>50</sub> treatment group,  
276 thiamethoxam LC<sub>30</sub> treatment group, and thiamethoxam LC<sub>50</sub> treatment group. L1 =  $e_{xj}$  of first instar  
277 nymphs; L2 =  $e_{xj}$  of second instar nymphs; L3 =  $e_{xj}$  of third instar nymphs; and L4 =  $e_{xj}$  of fourth instar  
278 nymphs. (XLS)

279

280 S1 Table. Toxic effects of imidacloprid and thiamethoxam on newly hatched nymphs of *Aphis glycines*.

281 SE = Standard error (XLS)

282

283 S2 Table. Mean value ( $\pm$  SE) of life history parameters of *Aphis glycines* exposed to imidacloprid and

284 thiamethoxam. SE = Standard error. Means ( $\pm$  SE) followed by different letters in the same row are

285 significantly different as calculated using the paired bootstrap test at the  $P < 0.05$  level. Leaves treated

286 with pure water were used as the control. L1 = mean longevity of first instar nymphs; L2 = mean

287 longevity of second instar nymphs; L3 = mean longevity of third instar nymphs; L4 = mean longevity

288 of fourth instar nymphs; Fecundity = mean fecundity per female adult. (DOC)

289

290 S3 Table. Mean value ( $\pm$  SE) of fertility parameters of *Aphis glycines* exposed to imidacloprid and

291 thiamethoxam. Means ( $\pm$  SE) followed by different letters in the same row are significantly different as

292 calculated using the paired bootstrap test at the  $P < 0.05$  level. Leaves treated with pure water were used

293 as the control. (DOC)

294

### Acknowledgments

295 This work was supported by the Heilongjiang Science Foundation Project (grant number C2018011),

296 Special Fund for Construction of Modern Agricultural Industry Technology System (grant number

297 CARS-04), and Research and Development of Technology and Products on Nature Enemy Insects

298 Prevent and Control (No: 2017YFD0201000).

299



300 **Author Contributions**

301 All authors conceived research. AZ conducted experiments. AZ, LZ and TL analysed data and conducted  
302 statistical analyses. AZ, LH and ZS wrote the manuscript. LH and KZ secured funding. All authors read  
303 and approved the manuscript.

## References

- 304 Abbas, N., Shad, S. A., & Shah, R. M. (2015). Resistance status of *Musca domestica* L. populations to  
305 neonicotinoids and insect growth regulators in Pakistan poultry facilities. *Pak. J. Zool.* 47,  
306 1663–1671.
- 307 Basit, M., Saeed, S., Saleem, M. A., Denholm, I., & Shah, M. (2013). Detection of resistance,  
308 cross-resistance, and stability of resistance to new chemistry insecticides in *Bemisia tabaci*  
309 (Homoptera: Aleyrodidae). *J. Econ. Entomol.* 106, 1414–1422. <https://doi.org/10.1603/ec12414>.
- 310 Bass, C., Puinean, A. M., Andrews, M., Cutler, P., Daniels, M., Elias, J., ... Slater, R. (2011). Mutation  
311 of a nicotinic acetylcholine receptor  $\beta$  subunit is associated with resistance to neonicotinoid  
312 insecticides in the aphid *Myzus persicae*. *BMC Neurosci.* 12, 51.  
313 <https://doi.org/10.1186/1471-2202-12-51>.
- 314 Bass, C., Denholm, I., Williamson, M. S., & Nauen, R. (2015). The global status of insect resistance to  
315 neonicotinoid insecticides. *Pestic. Biochem. Phys.* 121, 78–87.  
316 <https://doi.org/10.1016/j.pestbp.2015.04.004>.
- 317 Chi, H., & Liu, H. (1985). Two new methods for the study of insect population ecology. *B. I. Zool.*  
318 *Acad.* 24, 225–240.
- 319 Chi, H., & Su, H. Y. (2006). Age-stage, two-sex life tables of *Aphidius gifuensis* (Ashmead)  
320 (Hymenoptera: Braconidae) and its host *Myzus persicae* (Sulzer) (Homoptera: Aphididae) with  
321 mathematical proof of the relationship between female fecundity and the net reproductive rate.  
322 *Environ. Entomol.* 35, 10–21.

- 323 Chi, H. (1988). Life-table analysis incorporating both sexes and variable development rate among  
324 individuals. *Environ. Entomol.* 17, 26–34. <https://doi.org/10.1093/ee/17.1.26>.
- 325 Chi, H., & Getz, W. M. (1988). Mass rearing and harvesting based on an age-stage, two-sex life table: a  
326 potato tuber worm (Lepidoptera: Gelechiidae) case study. *Environ. Entomol.* 17, 18–25.
- 327 Chi, H. (2012). TWSEX-MSChart: a computer program for the age-stage, two-sex life table analysis.  
328 (<http://140.120.197.173/Ecology/prod02.htm>).
- 329 Cordero, R. J., Bloomquist, J. R., & Kuhar, T. P. (2007). Susceptibility of two diamondback moth  
330 parasitoids, *Diadegma insulare* (Cresson) (Hymenoptera; Ichneumonidae) and *Oomyzus*  
331 *sokolowskii* (Kurdjumov) (Hymenoptera; Eulophidae), to selected commercial insecticides. *Biol.*  
332 *Control.* 42, 48–54. <https://doi.org/10.1016/j.biocontrol.2007.04.005>.
- 333 Feliciangeli, M. D., & Rabinovich, J. (1985). Vital statistics of triatominae (Hemiptera: reduviidae)  
334 under laboratory conditions II. *Triatoma maculata*. *J. Med. Entomol.* 22, 43–48.  
335 <https://doi.org/10.1093/jmedent/22.1.43>.
- 336 Fisher, R. A. (1993). The genetical theory of natural selection: a complete variorum edition. Oxford  
337 University Press, Oxford, United Kingdom.
- 338 Gabre, R. M., Adham, F. K., & Chi, H. (2005). Life table of *Chrysomya megacephala* (Fabricius)  
339 (Diptera: Calliphoridae). *Acta Oecol.* 27, 179–183. <https://doi.org/10.1016/j.actao.2004.12.002>.
- 340 Goodman, D. (1982). Optimal life histories, optimal notation, and the value of reproductive value. *Am.*  
341 *Nat.* 119, 803–823.

- 342 Gore, J., Cook, D., Catchot, A., Leonard, B. R., Stewart, S. D., Lorenz, G., ... Kerns, D. (2013). Cotton  
343 aphid (Heteroptera: Aphididae) susceptibility to commercial and experimental insecticides in the  
344 southern United States. *J. Econ. Entomol.* 106, 1430–1439. <https://doi.org/10.1603/ec13116>.
- 345 Hanson, A. A., Menger-Anderson, J., Silverstein, C., Potter, B. D., MacRae, I. V., Hodgson, E. W., ...  
346 Koch, R. L. (2017). Evidence for soybean aphid (Hemiptera: Aphididae) resistance to pyrethroid  
347 insecticides in the upper Midwestern United States. *J. Econ. Entomol.* 110, 2235–2246.  
348 <https://doi.org/10.1093/jee/tox235>.
- 349 Hopper, K. R., Lanier, K., Rhoades, J. H., Hoelmer, K. A., Meikle, W. G., Heimpel, G. E., ... Woolley,  
350 J. B. (2017). Host specificity of *Aphelinus* species collected from soybean aphid in Asia. *Biol.*  
351 *Control.* 115, 55–73. <https://doi.org/10.1016/j.biocontrol.2017.09.004>.
- 352 Isman, M. B. (2006). Botanical insecticides, deterrents, and repellents in modern agriculture and an  
353 increasingly regulated world. *Annu. Rev. Entomol.* 51, 45–66.  
354 <https://doi.org/10.1146/annurev.ento.51.110104.151146>.
- 355 James, D. G., & Price, T. S. (2002). Fecundity in two-spotted spider mite (Acari: Tetranychidae) is  
356 increased by direct and systemic exposure to imidacloprid. *J. Econ. Entomol.* 95, 729–732.  
357 <https://doi.org/10.1603/0022-0493-95.4.729>.
- 358 Jan, M. T., Abbas, N., Shad, S. A., & Saleem, M. A. (2015). Resistance to organophosphate, pyrethroid  
359 and biorational insecticides in populations of spotted bollworm, *Earias vittella* (Fabricius)  
360 (Lepidoptera: noctuidae), in Pakistan. *Crop Prot.* 78, 247–252.  
361 <https://doi.org/10.1016/j.cropro.2015.09.020>.

- 362 Khan, H., Abbas, N., Shad, S. A., & Afzal, M. B. S. (2014). Genetics and realized heritability of  
363 resistance to imidacloprid in a poultry population of house fly, *Musca domestica* L. (Diptera:  
364 Muscidae) from Pakistan. *Pestic. Biochem. Phys.* 114, 38–43.  
365 <https://doi.org/10.1016/j.pestbp.2014.07.005>.
- 366 Koo, H. N., An, J. J., Park, S. E., Kim, J. I., & Kim, G. H. (2014). Regional susceptibilities to 12  
367 insecticides of melon and cotton aphid, *Aphis gossypii* (Hemiptera: Aphididae) and a point  
368 mutation associated with imidacloprid resistance. *Crop Prot.* 55, 91–97.  
369 <https://doi.org/10.1016/j.cropro.2013.09.010>.
- 370 Lee, C. C. (2000). Sublethal effects of insecticides on longevity, fecundity and behaviour of insect  
371 pests: a review. *J. Biosci.* 11, 107–112.
- 372 Luo, C., Jones, C. M., Devine, G., Zhang, F., Denholm, I., & Gorman, K. (2010). Insecticide resistance  
373 in *Bemisia tabaci* biotype Q (Hemiptera: Aleyrodidae) from China. *Crop Prot.* 29, 429–434.  
374 <https://doi.org/10.1016/j.cropro.2009.10.001>.
- 375 Matsuda, K., Buckingham, S. D., Kleier, D., Rauh, J. J., Grauso, M., & Sattelle, D. B. (2001).  
376 Neonicotinoids: insecticides acting on insect nicotinic acetylcholine receptors. *Trends. Pharmacol.*  
377 *Sci.* 22, 573–580. [https://doi.org/10.1016/s0165-6147\(00\)01820-4](https://doi.org/10.1016/s0165-6147(00)01820-4).
- 378 Matsumura, M., Sanada-Morimura, S., Otuka, A., Ohtsu, R., Sakumoto, S., Takeuchi, H., ... Satoh, M.  
379 (2013). Insecticide susceptibilities in populations of two rice planthoppers, *Nilaparvata lugens* and  
380 *Sogatella furcifera*, immigrating into Japan in the period 2005–2012. *Pest Manag. Sci.* 70, 615–622.  
381 <https://doi.org/10.1002/ps.3590>.

- 382 Menger, J., Beauzay, P., Chirumamilla, A., Dierks, C., Gavloski, J., Glogoza, P., ... Koch, R. L. (2020).  
383 Implementation of a diagnostic-concentration bioassay for detection of susceptibility to  
384 pyrethroids in soybean aphid (Hemiptera: Aphididae). *J. Econ. Entomol.* 113, 932–939.  
385 <https://doi.org/10.1093/jee/toz351>.
- 386 Nauen, R., & Denholm, I. (2005). Resistance of insect pests to neonicotinoid insecticides: current status  
387 and future prospects. *Arch. Insect. Biochem.* 58, 200–215. <https://doi.org/10.1002/arch.20043>.
- 388 Nauen, R., Jeschke, P., Velten, R., Beck, M. E., Ebbinghaus-Kintscher, U., Thielert, W., ... Raupach,  
389 G. (2014). Flupyradifurone: a brief profile of a new butenolide insecticide. *Pest Manag. Sci.* 71,  
390 850–862. <https://doi.org/10.1002/ps.3932>.
- 391 Ragsdale, D. W., Voegtlin, D. J., & O'neil, R. J. (2004). Soybean aphid biology in North America. *Ann.*  
392 *Entomol. Soc. Am.* 97, 204–208. <https://doi.org/10.1093/aesa/97.2.204>.
- 393 Ragsdale, D. W., Landis, D. A., Brodeur, J., Heimpel, G. E., & Desneux, N. (2011). Ecology and  
394 management of the soybean aphid in North America. *Annu. Rev. Entomol.* 56, 375–399.  
395 <https://doi.org/10.1146/annurev-ento-120709-144755>.
- 396 Shi, T. F., Wang, Y. F., Liu, F., Qi, L., & Yu, L. S. (2017). Sublethal effects of the neonicotinoid  
397 insecticide thiamethoxam on the transcriptome of the honey bees (Hymenoptera: Apidae). *J. Econ.*  
398 *Entomol.* 110, 2283–2289. <https://doi.org/10.1093/jee/tox262>.
- 399 Somar, R. O., Zamani, A. A., & Alizadeh, M. (2019). Joint action toxicity of imidacloprid and  
400 pymetrozine on the melon aphid, *Aphis gossypii*. *Crop Prot.* 124, 104850.  
401 <https://doi.org/10.1016/j.cropro.2019.104850>.

- 402 Srigiriraju, L., Semtner, P. J., & Bloomquist, J. R. (2010). Monitoring for imidacloprid resistance in the  
403 tobacco adapted form of the green peach aphid, *Myzus persicae* (Sulzer) (Hemiptera: Aphididae),  
404 in the eastern United States. *Pest. Manag. Sci.* 66, 676–685. <https://doi.org/10.1002/ps.1929>.
- 405 Stark, J. D., & Wennergren, U. (1995). Can population effects of pesticides be predicted from  
406 demographic toxicological studies? *J. Econ. Entomol.* 88, 1089–1096.  
407 <https://doi.org/10.1093/jee/88.5.1089>.
- 408 Stark, J. D., Tanigoshi, L., Bounfour, M., & Antonelli, A. (1997). Reproductive potential: its influence  
409 on the susceptibility of a species to pesticides. *Ecotoxicol. Environ. Saf.* 37, 273–279.  
410 <https://doi.org/10.1006/eesa.1997.1552>.
- 411 Tao, Y., Phung, D., Dong, F., Xu, J., Liu, X., Wu, X., ... Zheng, Y. (2019). Urinary monitoring of  
412 neonicotinoid imidacloprid exposure to pesticide applicators. *Sci. Total Environ.* 669, 721–728.  
413 <https://doi.org/10.1016/j.scitotenv.2019.03.040>.
- 414 Wang, L., Zhang, Y., Xie, W., Wu, Q., & Wang, S. (2016). Sublethal effects of spinetoram on the  
415 two-spotted spider mite, *Tetranychus urticae* (Acari: Tetranychidae). *Pestic. Biochem. Phys.* 132,  
416 102–107. <https://doi.org/10.1016/j.pestbp.2016.02.002>.
- 417 Wang, R. Y., Kritzman, A., Hershman, D. E., & Ghabrial, S. A. (2006). *Aphis glycines* as a vector of  
418 persistently and nonpersistently transmitted viruses and potential risks for soybean and other crops.  
419 *Plant Dis.* 90, 920–926. <https://doi.org/10.1094/pd-90-0920>.
- 420 Xie, W., Wang, S., Wu, Q., Feng, Y., Pan, H., Jiao, X., ... Zhang, Y. (2010). Induction effects of host  
421 plants on insecticide susceptibility and detoxification enzymes of *Bemisia tabaci* (Hemiptera:  
422 Aleyrodidae). *Pest. Manag. Sci.* 67, 87–93. <https://doi.org/10.1002/ps.2037>.

423 Zhao, Y., Wang, Q., Ding, J., Wang, Y., Zhang, Z., Liu, F., ... Mu, W. (2018). Sublethal effects of  
424 chlorfenapyr on the life table parameters, nutritional physiology and enzymatic properties of  
425 *Bradysia odoriphaga* (Diptera: Sciaridae). Pestic. Biochem. Phys. 148, 93–102.  
426 <https://doi.org/10.1016/j.pestbp.2018.04.003>.



428 **Tables**

429 **Table 1.**

430 Toxic effects of imidacloprid and thiamethoxam on newly hatched nymphs of *Aphis glycines*

| Insecticide  | Concentration (mg a.i./L) (95 % CL) <sup>-1</sup> |                     | Slope ± SE    | $\chi^2$ (df) |
|--------------|---------------------------------------------------|---------------------|---------------|---------------|
|              | LC <sub>50</sub>                                  | LC <sub>30</sub>    |               |               |
| Imidacloprid | 4.440 (3.672–5.335)                               | 3.114 (2.425–3.757) | 3.402 ± 0.469 | 0.464 (5)     |
| Thiamethoxam | 7.049 (5.394–8.998)                               | 4.184 (2.850–5.460) | 2.314 ± 0.339 | 0.502 (5)     |

431 SE = Standard error

432 **Table 2.**

433 Mean value ( $\pm$  SE) of life history parameters of *Aphis glycines* exposed to imidacloprid and

434 thiamethoxam

| Parameters                           | LC <sub>30</sub>  |                   |                   | LC <sub>50</sub>  |                   |
|--------------------------------------|-------------------|-------------------|-------------------|-------------------|-------------------|
|                                      | Control           | Imidacloprid      | Thiamethoxam      | Imidacloprid      | Thiamethoxam      |
| L1 (day)                             | 1.23 $\pm$ 0.04c  | 1.19 $\pm$ 0.05c  | 1.14 $\pm$ 0.04c  | 1.88 $\pm$ 0.09a  | 1.57 $\pm$ 0.11b  |
| L2 (day)                             | 1.2 $\pm$ 0.04b   | 1.17 $\pm$ 0.05b  | 1.14 $\pm$ 0.04b  | 1.43 $\pm$ 0.08a  | 1.28 $\pm$ 0.07ab |
| L3 (day)                             | 1.13 $\pm$ 0.05a  | 1.14 $\pm$ 0.05a  | 1.15 $\pm$ 0.05a  | 1.17 $\pm$ 0.06a  | 1.15 $\pm$ 0.05a  |
| L4 (day)                             | 1.01 $\pm$ 0.01a  | 1.02 $\pm$ 0.02a  | 1.02 $\pm$ 0.02a  | 1.1 $\pm$ 0.05a   | 1.06 $\pm$ 0.04a  |
| Mean longevity of female adult (day) | 11.02 $\pm$ 0.55a | 8.95 $\pm$ 0.56b  | 9.31 $\pm$ 0.62b  | 8.48 $\pm$ 0.64b  | 8.62 $\pm$ 0.55b  |
| APOP (day)                           | 0.20 $\pm$ 0.04b  | 0.05 $\pm$ 0.03c  | 0.02 $\pm$ 0.02c  | 1.11 $\pm$ 0.15a  | 1.07 $\pm$ 0.15a  |
| TPOP (day)                           | 4.66 $\pm$ 0.07c  | 4.55 $\pm$ 0.08c  | 4.29 $\pm$ 0.07d  | 6.68 $\pm$ 0.20a  | 5.93 $\pm$ 0.18b  |
| Fecundity                            | 42.49 $\pm$ 1.83a | 20.91 $\pm$ 1.39b | 22.66 $\pm$ 1.60b | 13.88 $\pm$ 1.56c | 16.02 $\pm$ 1.37c |

435 SE = Standard error. Means ( $\pm$  SE) followed by different letters in the same row are significantly

436 different as calculated using the paired bootstrap test at the  $P < 0.05$  level. Leaves treated with pure

437 water were used as the control. L1 = mean longevity of first instar nymphs; L2 = mean longevity of

438 second instar nymphs; L3 = mean longevity of third instar nymphs; L4 = mean longevity of fourth

439 instar nymphs; Fecundity = mean fecundity per female adult.

440

441

442

443

444

445

446

447

448 **Table 3.**

449 Mean value ( $\pm$  SE) of fertility parameters of *Aphis glycines* exposed to imidacloprid and thiamethoxam

| Population parameters                              | LC <sub>30</sub>   |                    |                    | LC <sub>50</sub>   |                    |
|----------------------------------------------------|--------------------|--------------------|--------------------|--------------------|--------------------|
|                                                    | Control            | Imidacloprid       | Thiamethoxam       | Imidacloprid       | Thiamethoxam       |
| Intrinsic rate of increase ( $r$ ) ( $d^{-1}$ )    | 0.439 $\pm$ 0.008a | 0.310 $\pm$ 0.014b | 0.341 $\pm$ 0.015b | 0.180 $\pm$ 0.019c | 0.223 $\pm$ 0.016c |
| Finite rate of increase ( $\lambda$ ) ( $d^{-1}$ ) | 1.551 $\pm$ 0.012a | 1.363 $\pm$ 0.019b | 1.406 $\pm$ 0.021b | 1.198 $\pm$ 0.023c | 1.250 $\pm$ 0.020c |
| Net reproductive rate ( $R_0$ )                    | 36.54 $\pm$ 2.156a | 11.92 $\pm$ 1.303b | 13.82 $\pm$ 1.466b | 5.55 $\pm$ 0.916c  | 7.69 $\pm$ 1.028c  |
| Mean generation time ( $T$ ) (d)                   | 8.20 $\pm$ 0.076b  | 7.99 $\pm$ 0.107bc | 7.71 $\pm$ 0.109c  | 9.50 $\pm$ 0.219a  | 9.16 $\pm$ 0.097a  |

450 Means ( $\pm$  SE) followed by different letters in the same row are significantly different as calculated

451 using the paired bootstrap test at the  $P < 0.05$  level. Leaves treated with pure water were used as the

452 control.



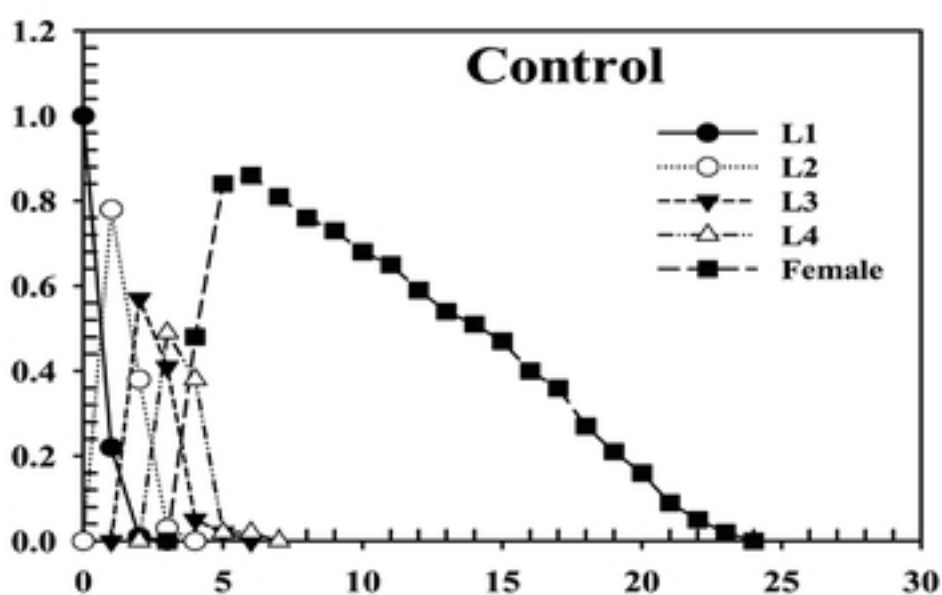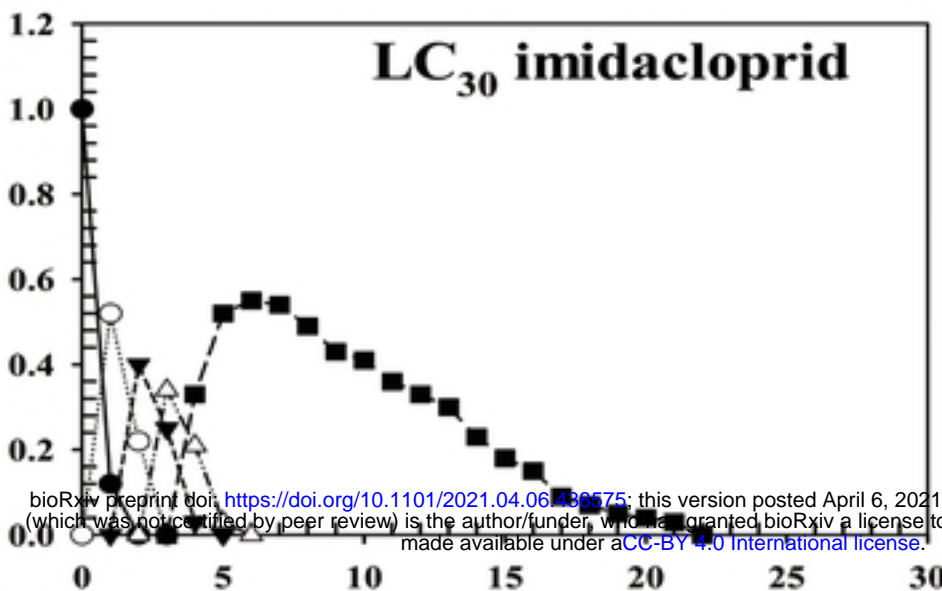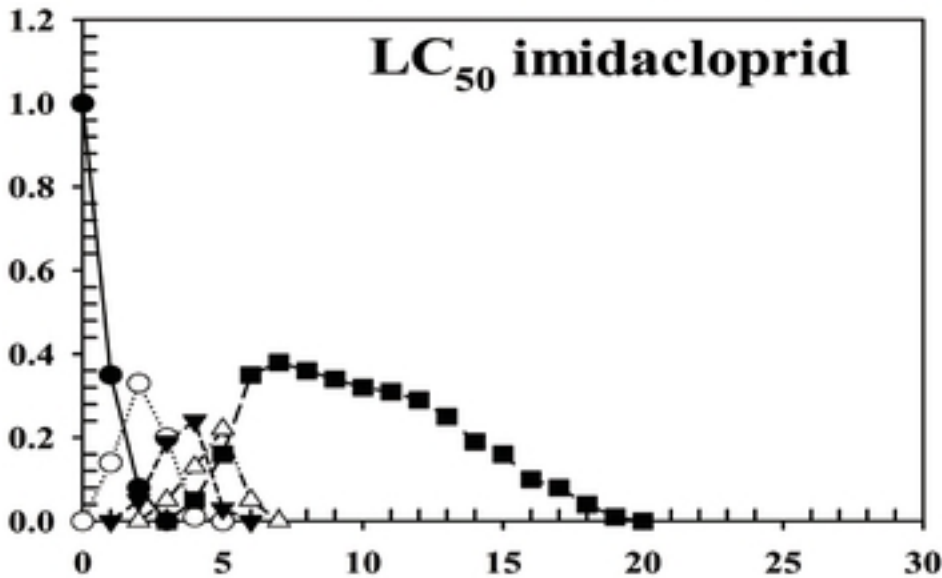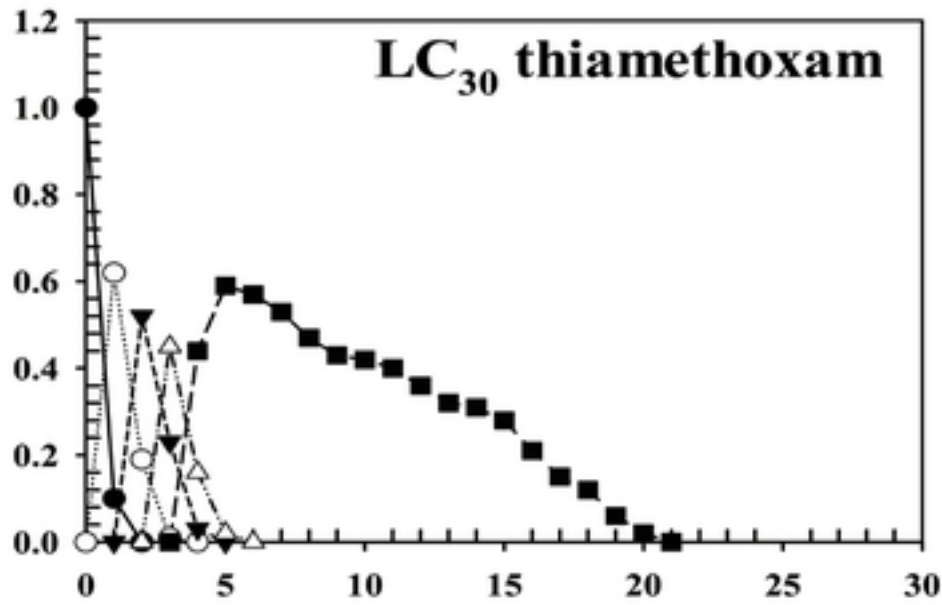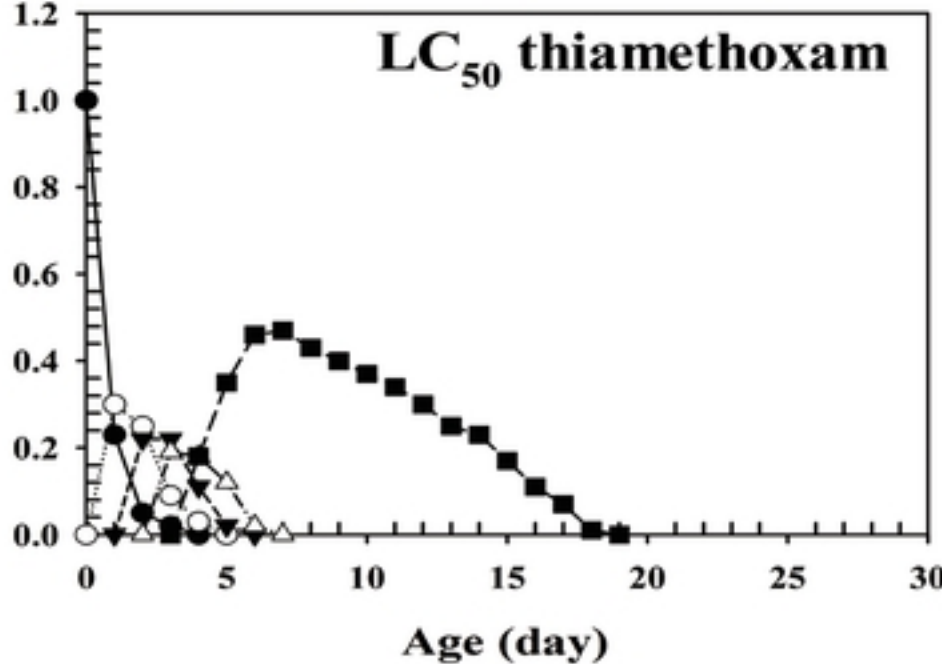

bioRxiv preprint doi: <https://doi.org/10.1101/2021.04.06.436575>; this version posted April 6, 2021. The copyright holder for this preprint (which was not certified by peer review) is the author/funder, who has granted bioRxiv a license to display the preprint in perpetuity. It is made available under aCC-BY 4.0 International license.

Age-stage survival rate ( $s_{xj}$ )

Age (day)

Figure

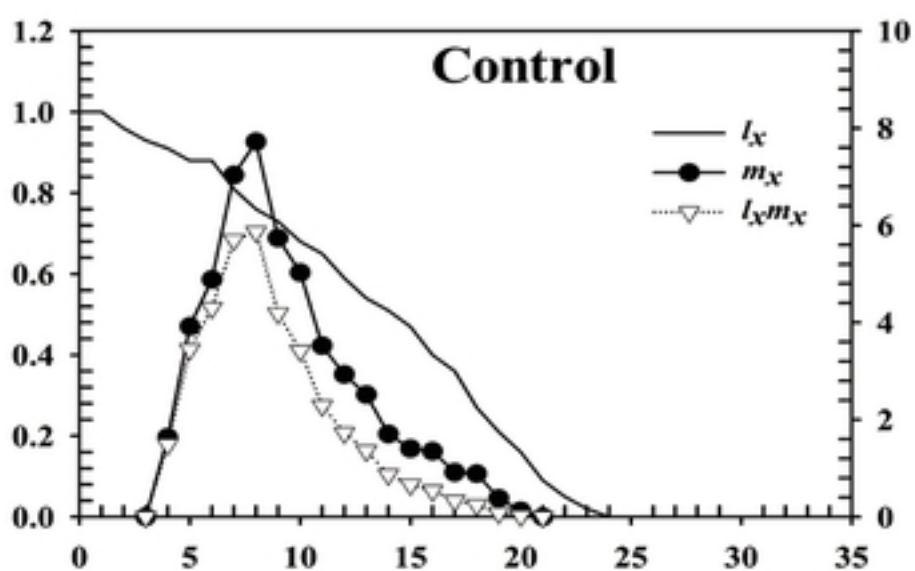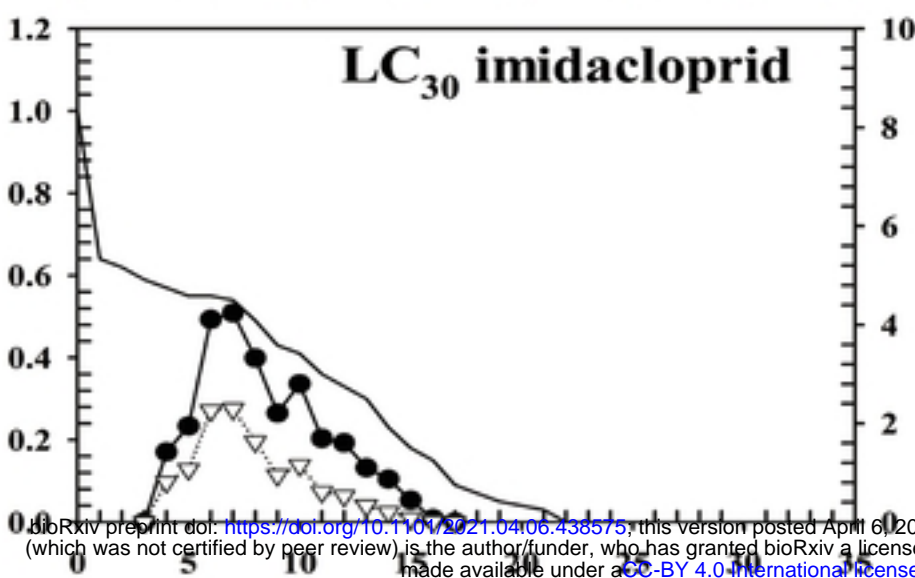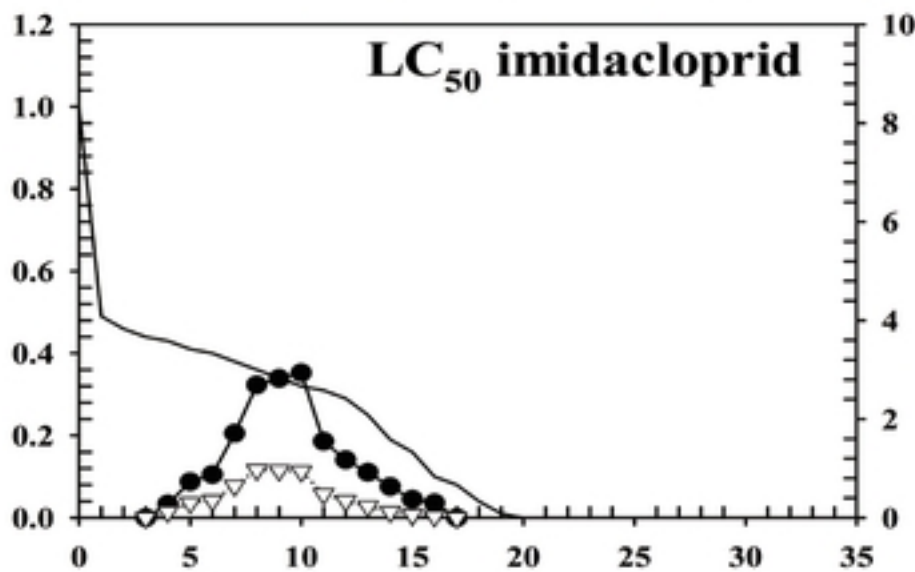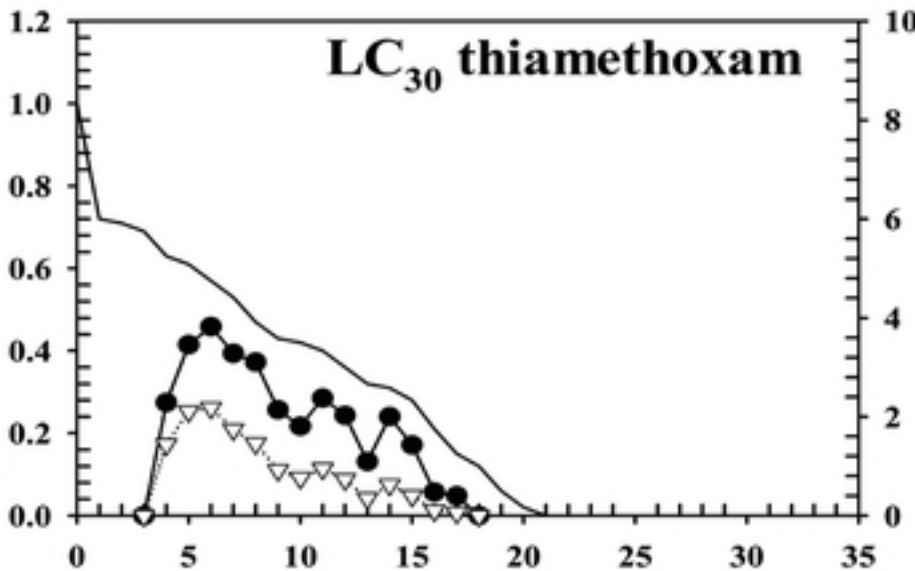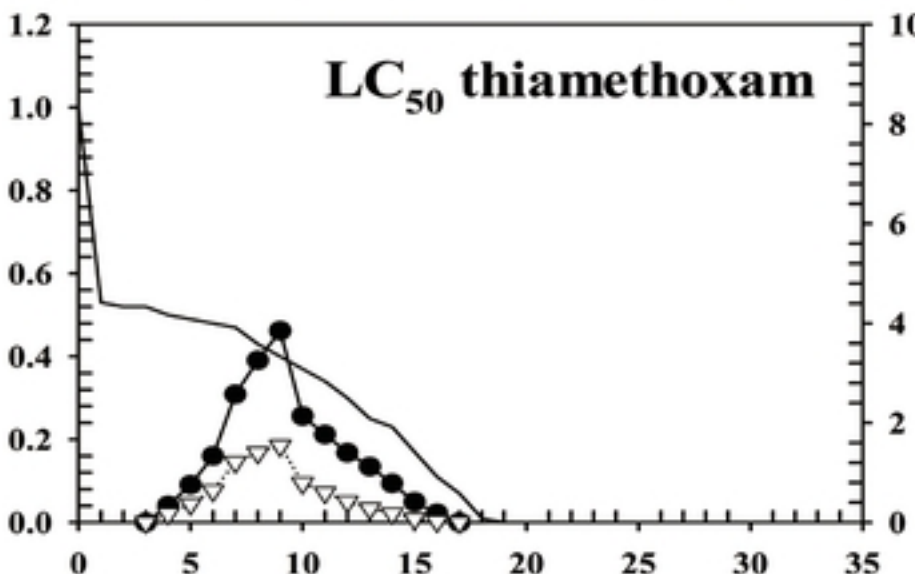

Age (day)

Survival rate ( $l_x$ )

Fecundity

Figure

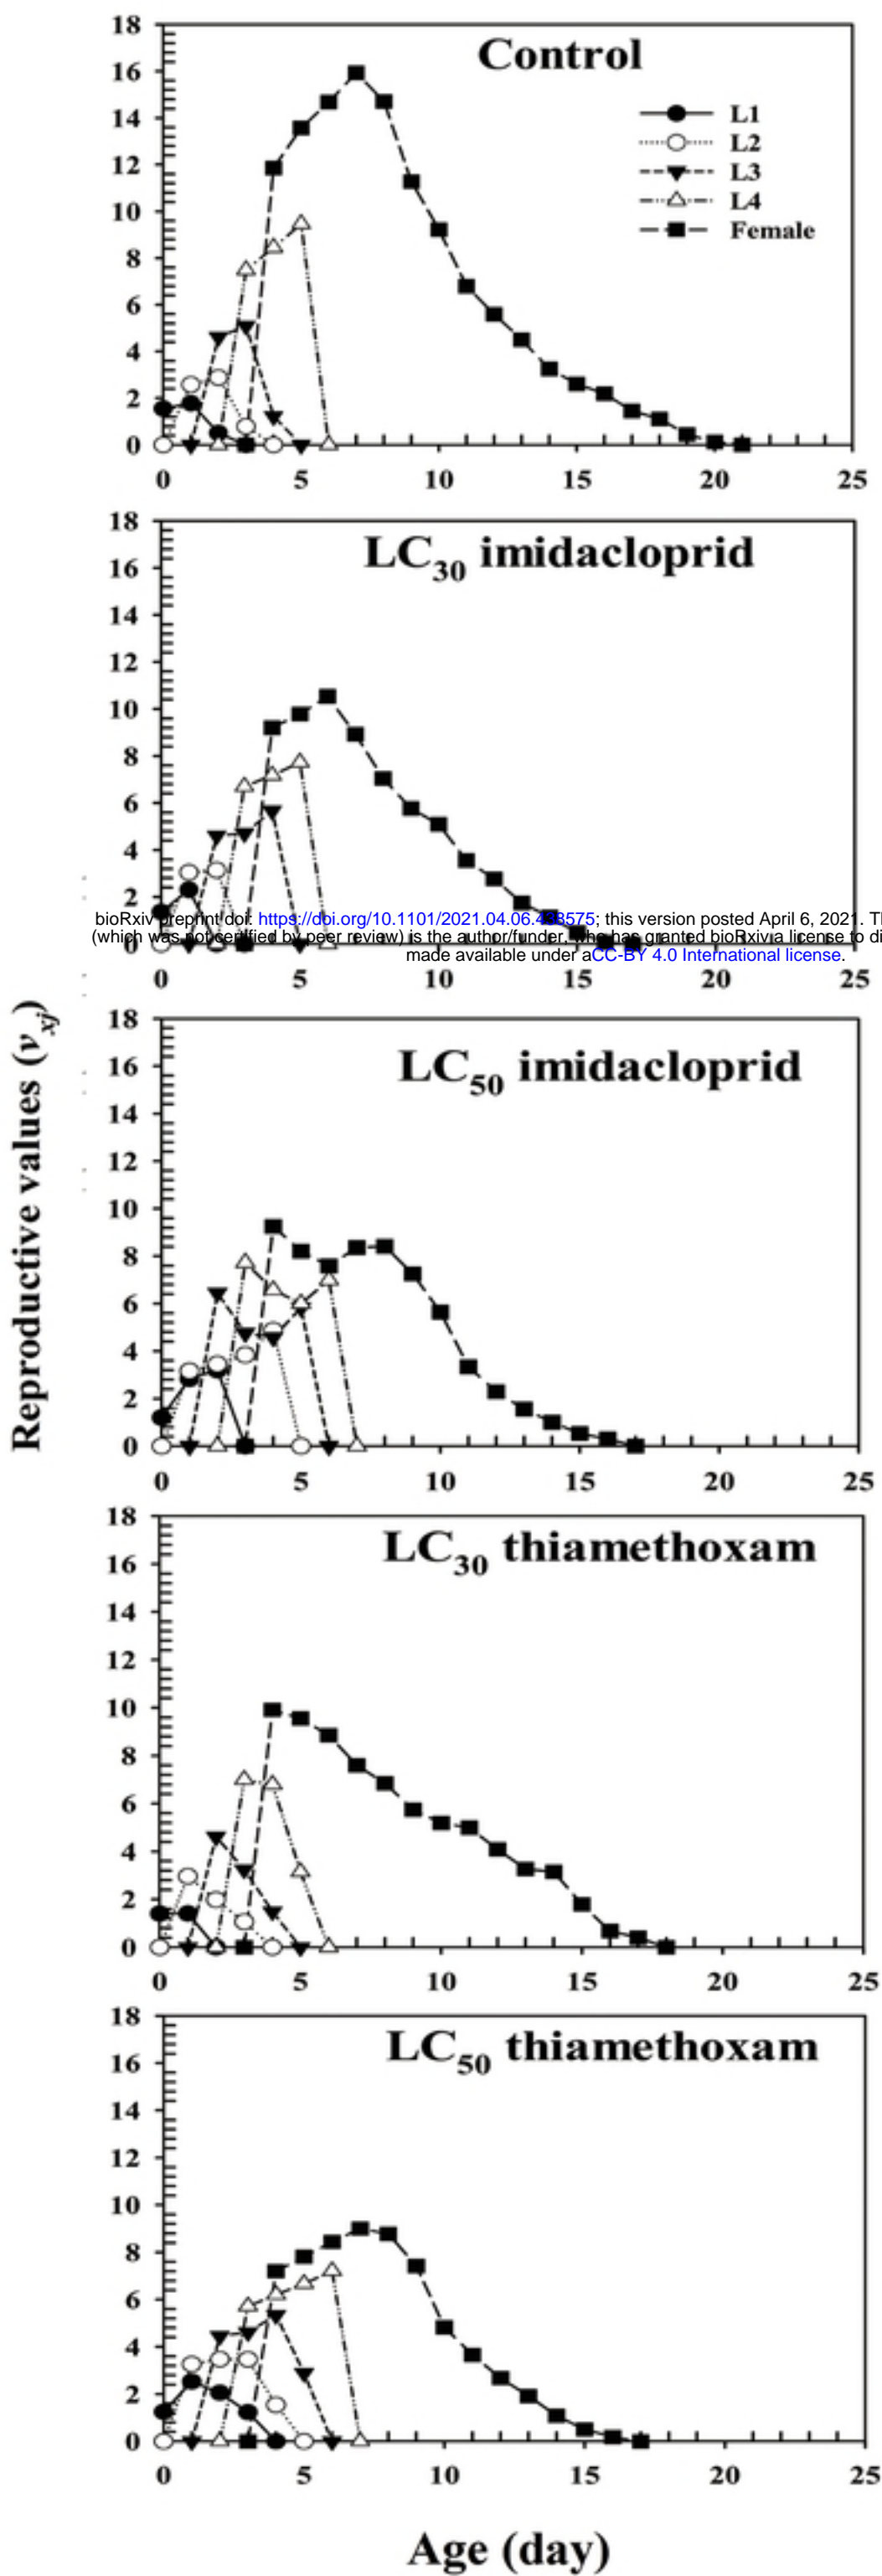

Figure

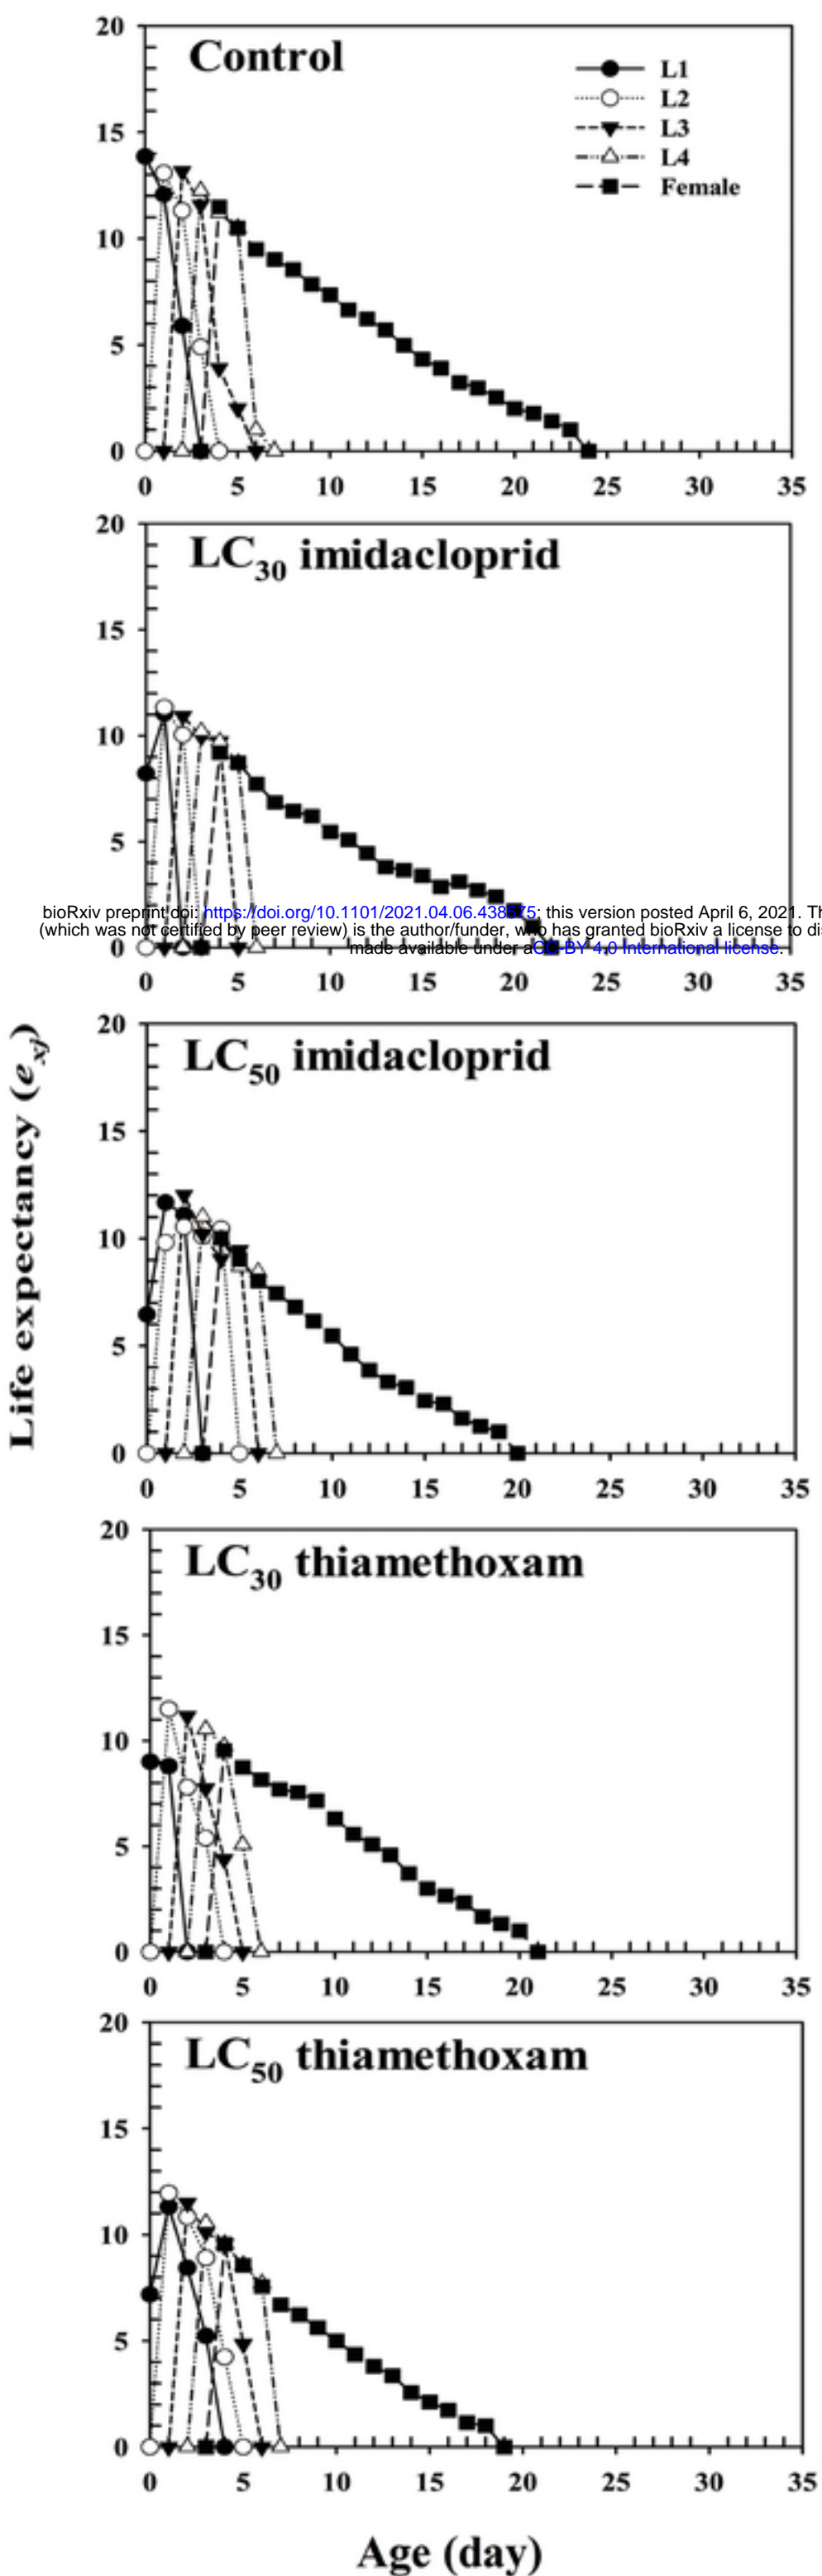

bioRxiv preprint doi: <https://doi.org/10.1101/2021.04.06.438575>; this version posted April 6, 2021. The copyright holder for this preprint (which was not certified by peer review) is the author/funder, who has granted bioRxiv a license to display the preprint in perpetuity. It is made available under aCC-BY 4.0 International license.

Figure
